# Supplementary material for: The intrinsic hydrogen evolution performance of 2D molybdenum carbide
Source: Royal Society of Chemistry journal article supplement (doi:10.1039/d0ta09451j), 2020-01-01
Supplement: d0ta09451j1.pdf [file d0ta09451j1.pdf]

## Supporting Information

### The intrinsic hydrogen evolution performance of 2D molybdenum carbide

Yuqiao Wang<sup>a</sup>, Wenting Hong<sup>a,b</sup>, Chuangyong Jian<sup>a,b</sup>, Xu He<sup>a</sup>, Qian Cai<sup>a</sup> and Wei Liu<sup>\*a,c</sup>

<sup>a</sup>. CAS Key Laboratory of Design and Assembly of Functional Nanostructures, Fujian Provincial Key Laboratory of Nanomaterial, Fujian Institute of Research on the Structure of Matter, Chinese Academy of Sciences, Fuzhou, Fujian, 350002, China

<sup>b</sup>. University of Chinese Academy of Sciences, Beijing, 100049, China

<sup>c</sup>. Fujian Provincial Key Laboratory of Nanomaterials, Fujian Institute of Research on the Structure of Matter, Chinese Academy of Sciences, Fuzhou, 350002, China

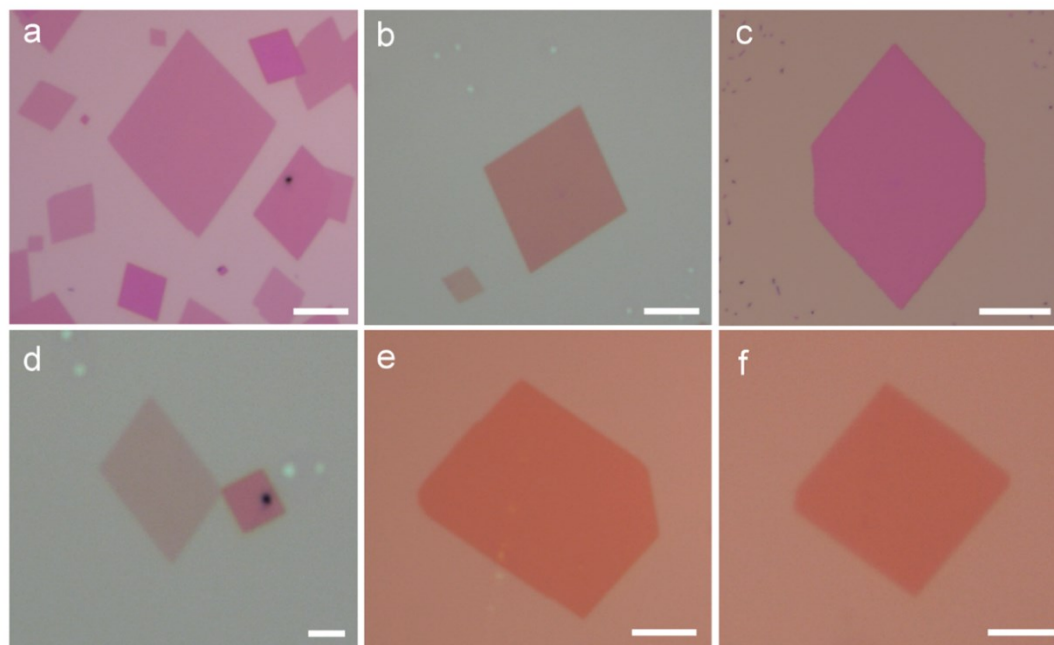

**Figure S1.** OM images of MoO<sub>2</sub> crystals with different shapes. (a) OM image of rhombic and parallelogram-type and pentagonal MoO<sub>2</sub> flakes, (b) rhombus, (c) hexagon, (d) parallelogram, (e) pentagon, and (f) rectangle. Scale bars are 10 μm.

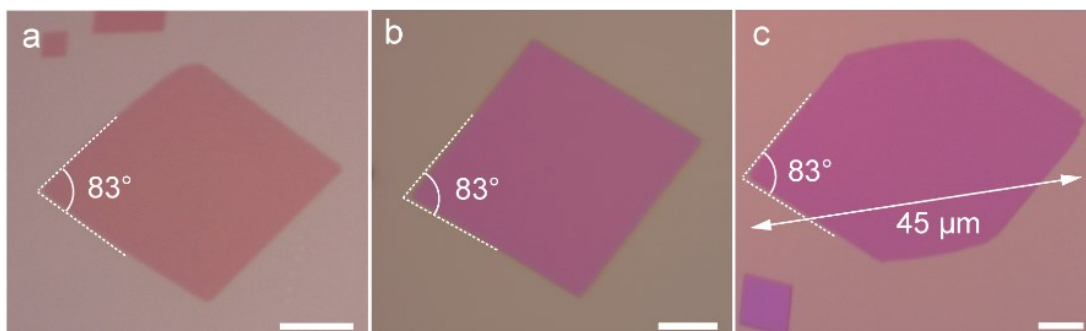

**Figure S2.** Thickness tunable growth of 2D MoO<sub>2</sub> crystals with varying growth temperature. (a–c) Optical microscopy (OM) images of rhombic and hexagonal MoO<sub>2</sub> flakes on the SiO<sub>2</sub>/Si substrate at increasing temperatures of ~790°C, ~810°C, ~830 °C, respectively. The acute angle of rhombic and hexagonal MoO<sub>2</sub> flakes is 83°. Scale bars: 5 μm.

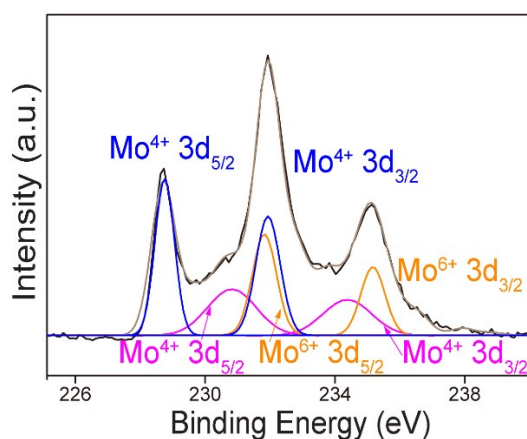

**Figure S3.** XPS results of Mo 3d regions of the synthesized MoO<sub>2</sub> flakes.

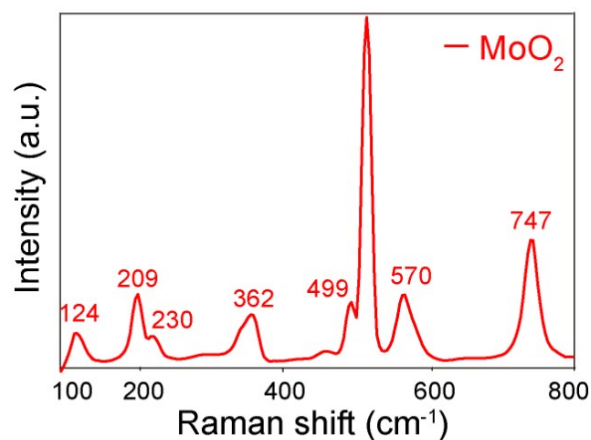

**Figure S4.** Raman spectra of the synthesized MoO<sub>2</sub> flakes.

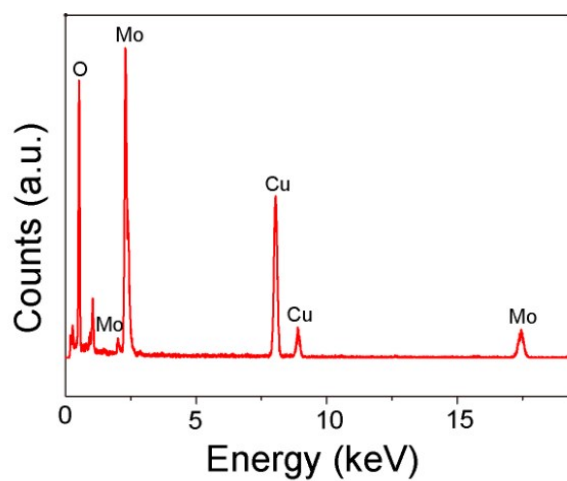

**Figure S5.** The energy dispersive spectrometry (EDS) analysis of the synthesized MoO<sub>2</sub> flakes.

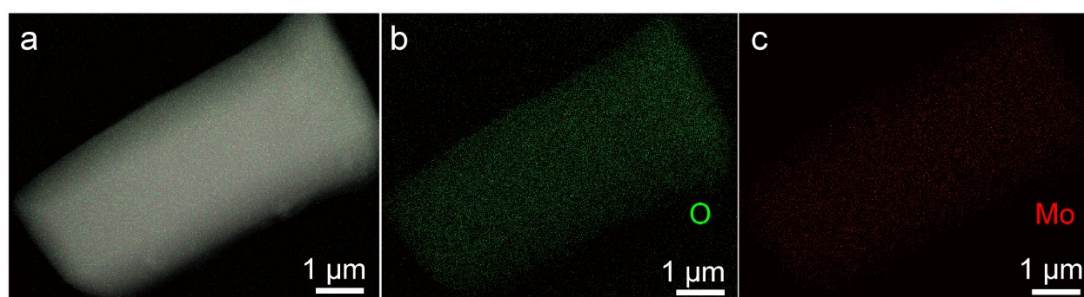

**Figure S6.** (a) High-angle annular dark-field scanning transmission electron microscopy image of a MoO<sub>2</sub> flake. (b, c) EDS mapping images of O and Mo for a MoO<sub>2</sub> flake achieved on a STEM grid, respectively.

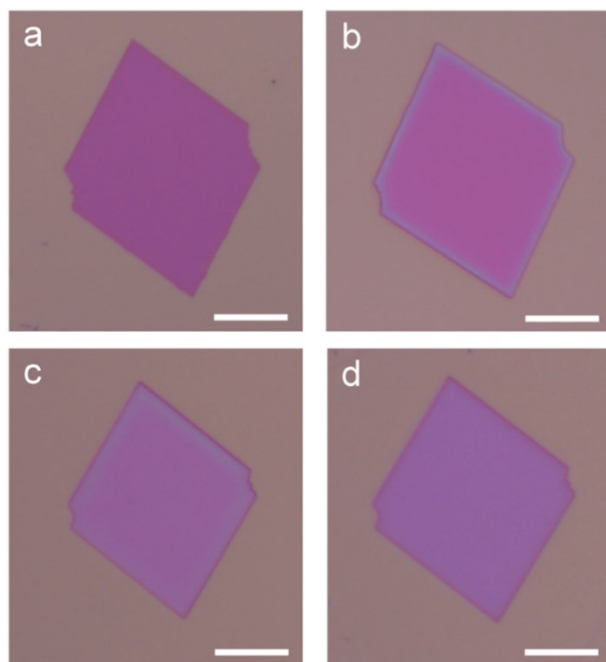

**Figure S7.** (a) Optical microscopy (OM) image of hexagonal MoO<sub>2</sub> flakes on the SiO<sub>2</sub>/Si substrate. (b) OM images of the MoO<sub>2</sub>/Mo<sub>2</sub>C lateral hybrid structure and Mo<sub>2</sub>C flakes grown at increasing carbonization time of ~10 min, ~15 min, ~40 min, respectively. The Mo<sub>2</sub>C ratio of b, c and d is approximate ~15%, ~35%, ~100%, respectively. Red, pink regions correspond to MoO<sub>2</sub>, Mo<sub>2</sub>C, respectively. Scale bars: 5  $\mu\text{m}$ .

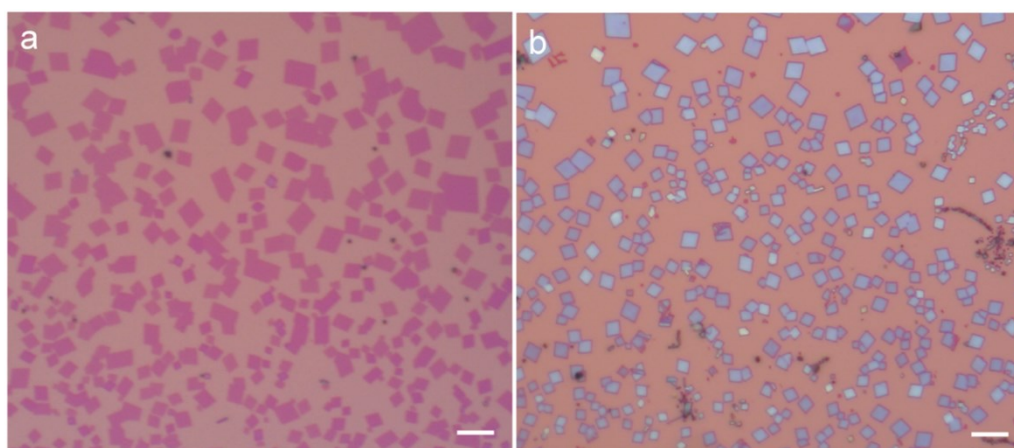

**Figure S8.** (a) Optical microscopy (OM) image of MoO<sub>2</sub> flakes on the SiO<sub>2</sub>/Si substrate. (b) Optical microscopy (OM) image of the Mo<sub>2</sub>C flakes on the SiO<sub>2</sub>/Si substrate. Scale bars: 10  $\mu\text{m}$ .

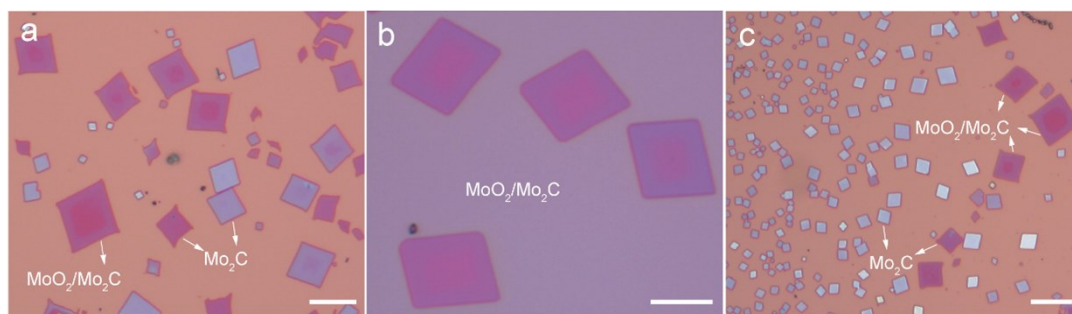

**Figure S9.** (a-c) Optical microscopy (OM) image of MoO<sub>2</sub>/Mo<sub>2</sub>C lateral hybrid structure and Mo<sub>2</sub>C flakes grown at increasing carbonization time of ~15 min. The smaller the lateral dimension of MoO<sub>2</sub> flakes, the easier it is to be carbonized. Scale bars: 10 μm.

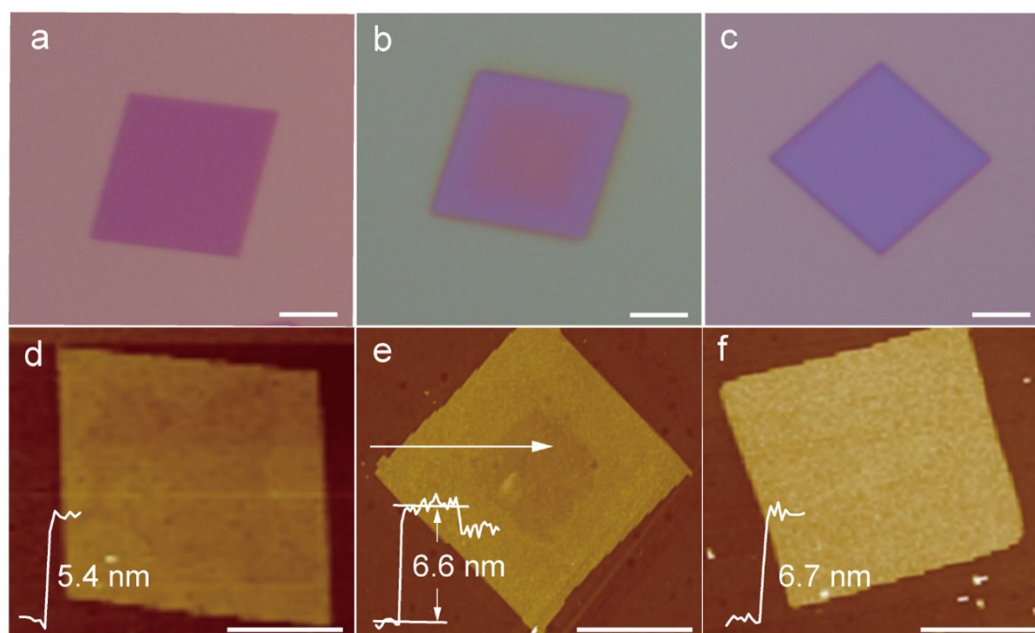

**Figure S10.** (a-c) Optical microscopy (OM) images of MoO<sub>2</sub>, MoO<sub>2</sub>/Mo<sub>2</sub>C lateral hybrid structure and fully converted Mo<sub>2</sub>C flakes on the SiO<sub>2</sub>/Si substrate. (d) The corresponding atomic force microscopy (AFM) image of MoO<sub>2</sub> flake in (b). (e) AFM image of MoO<sub>2</sub>/Mo<sub>2</sub>C lateral hybrid structure in (c). Inset is the height profile along the white arrow. (f) AFM image of fully converted α-Mo<sub>2</sub>C flake in (d). Scale bars: 5 μm.

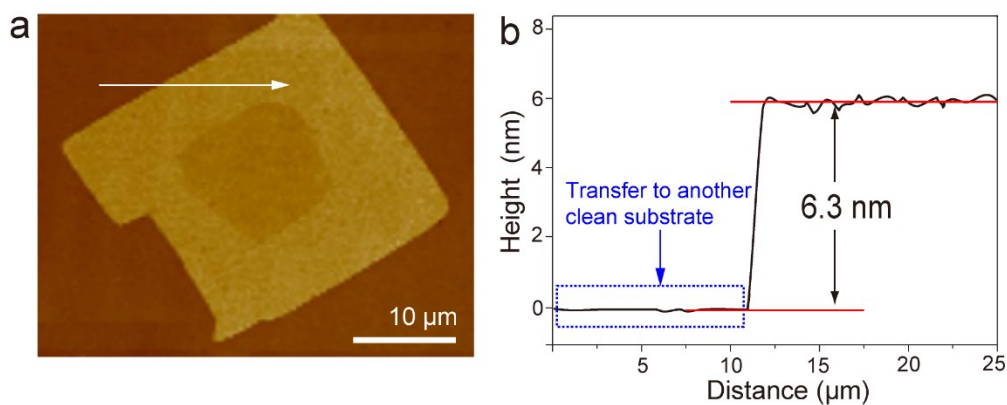

**Figure S11.** (a) OM image of the MoO<sub>2</sub>/Mo<sub>2</sub>C lateral hybrid structure is transferred to another clean SiO<sub>2</sub>/Si substrate to eliminate the influence of the roughness of the SiO<sub>2</sub>/Si substrate. (b) The corresponding height profile along the white arrow in (a).

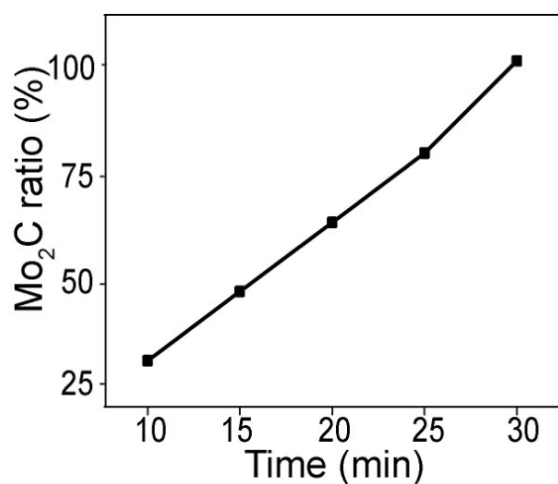

**Figure S12.** The ratio of Mo<sub>2</sub>C at different thermal annealing time.

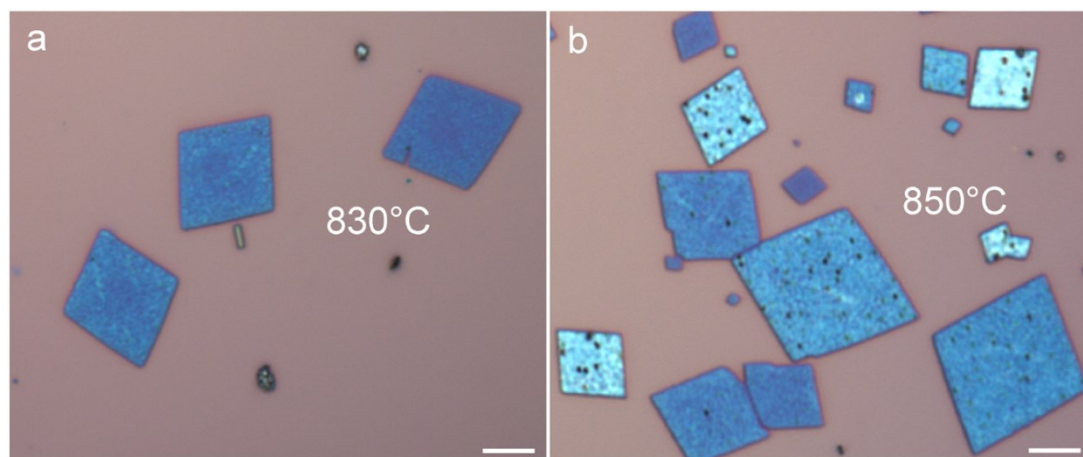

**Figure S13.** (a,b) OM images of the Mo<sub>2</sub>C flakes synthesized at 830 °C and 850 °C, respectively, showing rough surfaces and substantial morphological degradation.

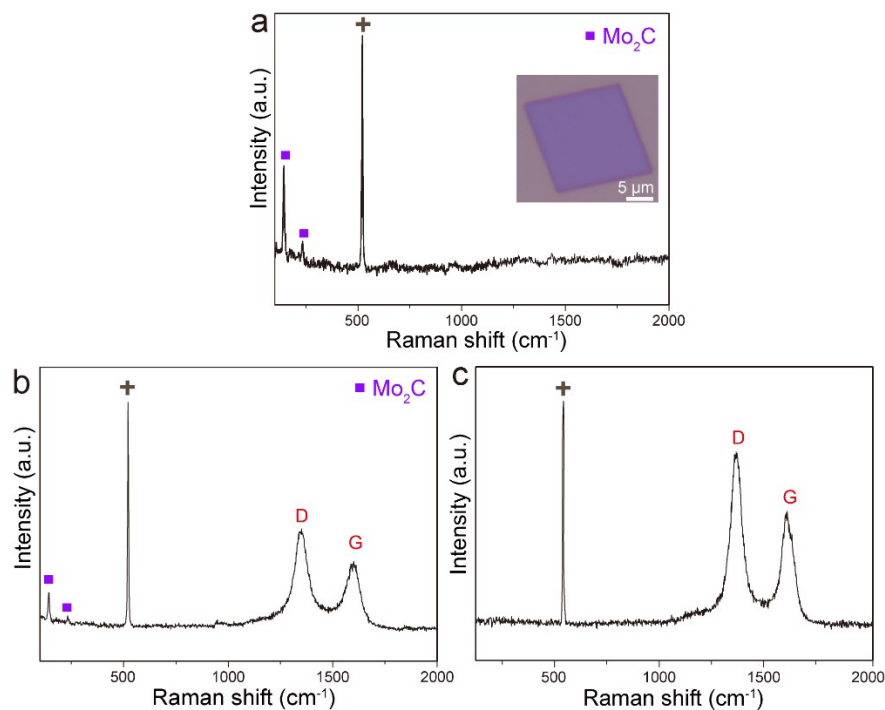

**Figure S14.** (a-c) Raman spectra of the synthesized  $\text{Mo}_2\text{C}$  at increasing carbonization time of  $\sim 40$  min,  $\sim 50$  min,  $\sim 60$  min, respectively (Carbonization temperature is  $800^\circ\text{C}$ ). Inset in (a): The corresponding OM image of the  $\text{Mo}_2\text{C}$  flake. When the calcination time is  $\sim 40$  min at  $800^\circ\text{C}$ , no other peaks are observed from the wide range of Raman shifts, such as the D ( $\sim 1350\text{ cm}^{-1}$ ) or G ( $\sim 1595\text{ cm}^{-1}$ ) mode of graphitic carbon. As the calcination time increases, two distinct D and G modes peaks are observed. The grey cross represents the Raman peak of Si.

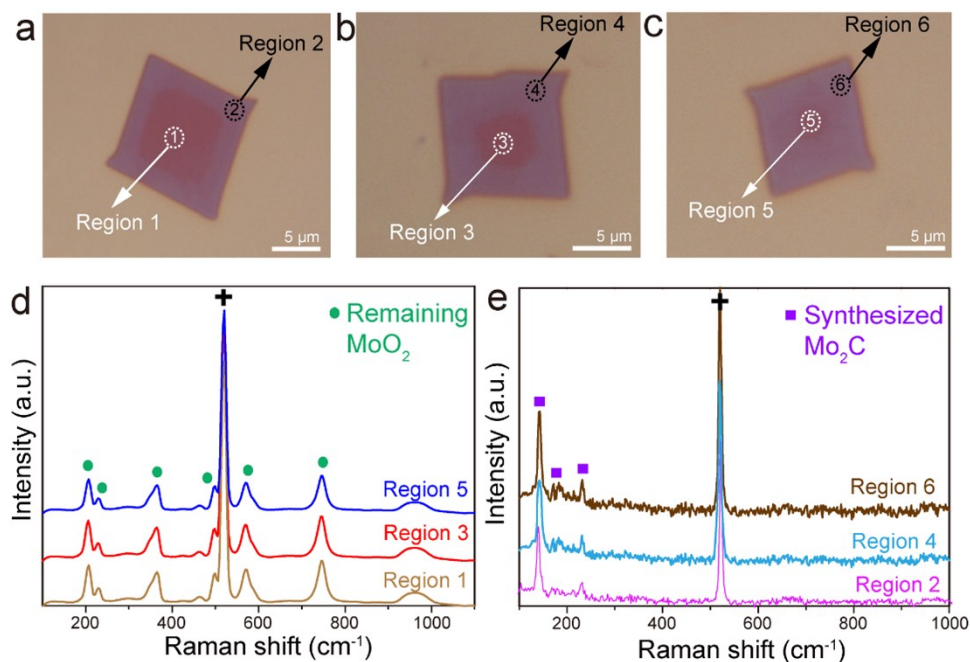

**Figure S15.** (a-c) OM images of MoO<sub>2</sub>/Mo<sub>2</sub>C lateral hybrid structure. The corresponding Mo<sub>2</sub>C to initial MoO<sub>2</sub> size ratio is approximately 50%, 65%, 80%, respectively. (d, e) The corresponding Raman Spectra of the remaining MoO<sub>2</sub> and the synthesized Mo<sub>2</sub>C in (a-c). The black cross represents the Raman peak of Si.

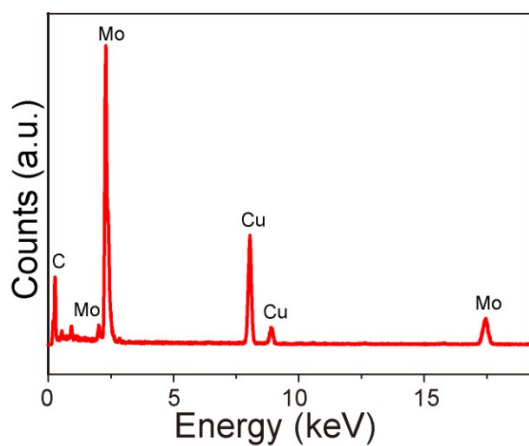

**Figure S16.** The EDS analysis of the Mo<sub>2</sub>C flakes synthesized on the SiO<sub>2</sub>/Si substrate.

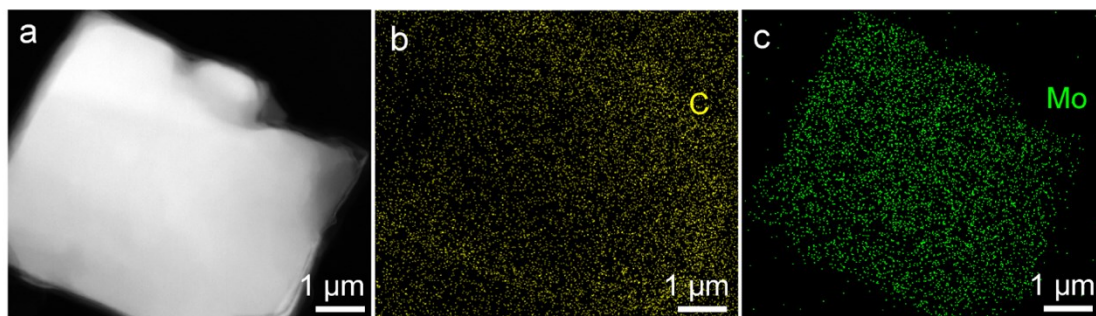



**Figure S17.** (a) High-angle annular dark-field scanning transmission electron microscopy image of a Mo<sub>2</sub>C flake. (b, c) EDS mapping images of C and Mo for a Mo<sub>2</sub>C flake achieved on a STEM grid, respectively.

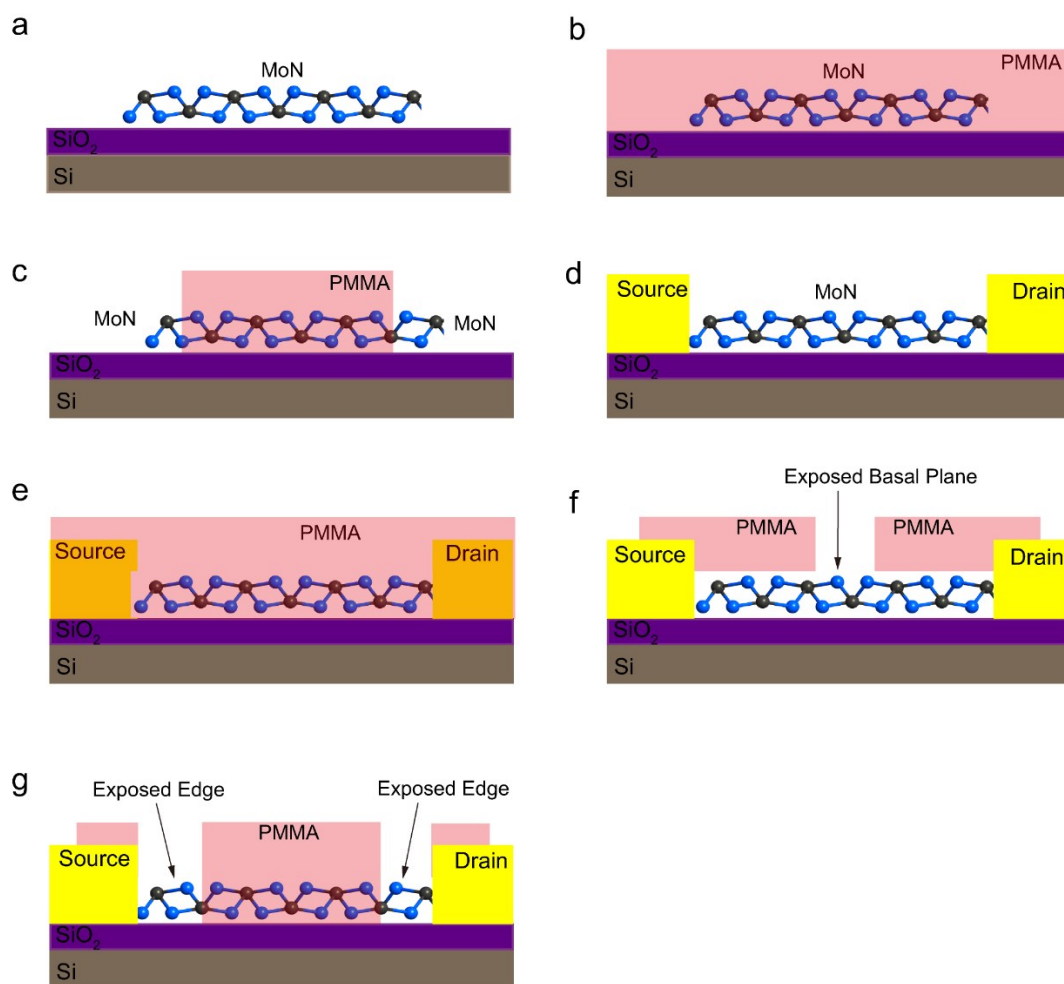

**Figure S18.** Illustrations displaying the EBL manufacture processes of electrochemical microcell devices setup. (a) The Mo<sub>2</sub>C flakes are transferred on the SiO<sub>2</sub>/Si substrate. (b) SiO<sub>2</sub>/Si substrate was covered with PMMA. (c) Electrodes patterns are defined by EBL. (d) Cr/Au electrodes deposited to contact selected individual nanosheets via thermal evaporation. (e) The microcell setup is covered with PMMA again. (f,g) Finally step of EBL to define windows on (f) only the exposed basal plane (while covering the edges) or (g) only the exposed edges (while covering the basal plane) and electrodes.

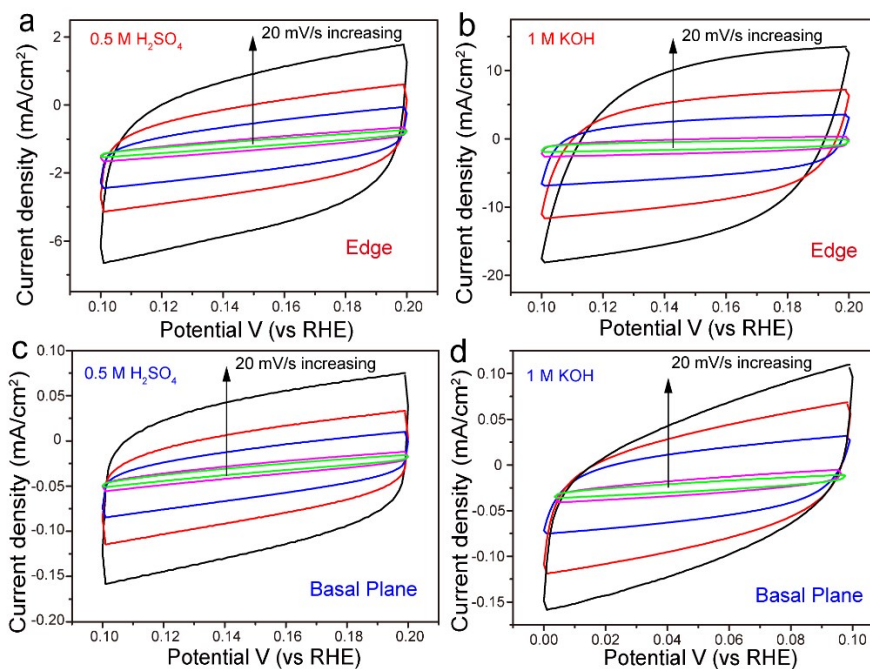

**Figure S19.** (a-d) Electrochemical cyclic voltammetry (CV) tests on edge and basal plane of Mo<sub>2</sub>C with different rates from 10 to 80 mV/s in the potential range of 0.10 ~ 0.20 V in 0.5 M H<sub>2</sub>SO<sub>4</sub> and 1 M KOH.

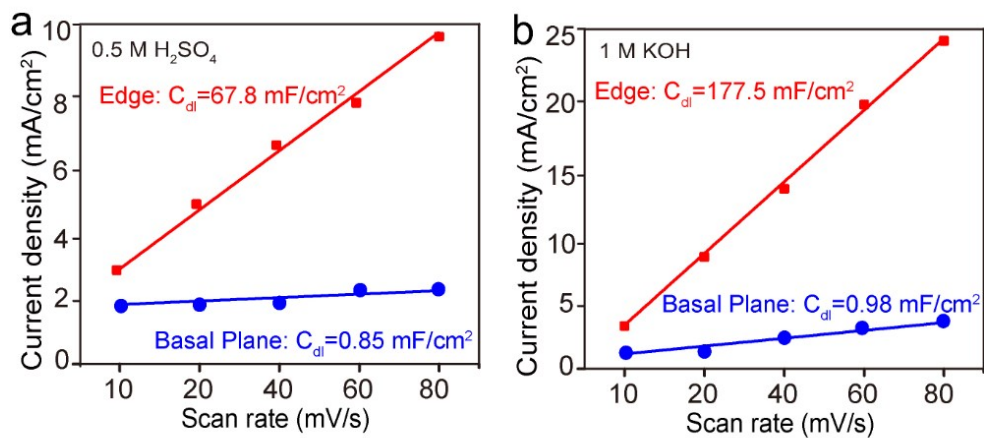

**Figure S20.** (a, b)  $C_{dl}$  measurements for determining electrochemically active surface areas of basal plane and edge of Mo<sub>2</sub>C in 0.5 M H<sub>2</sub>SO<sub>4</sub> and 1 M KOH.

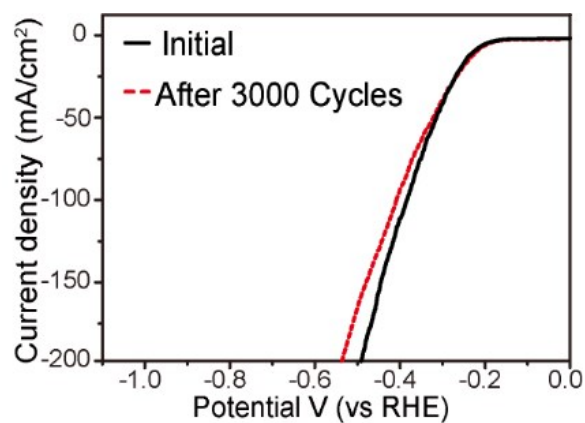

**Figure S21.** Long-term stability test for the 2D Mo<sub>2</sub>C nanosheet. The polarization curves were recorded at a scan rate of 5 mV s<sup>-1</sup> after 3000 potential cycles in 1 M KOH.

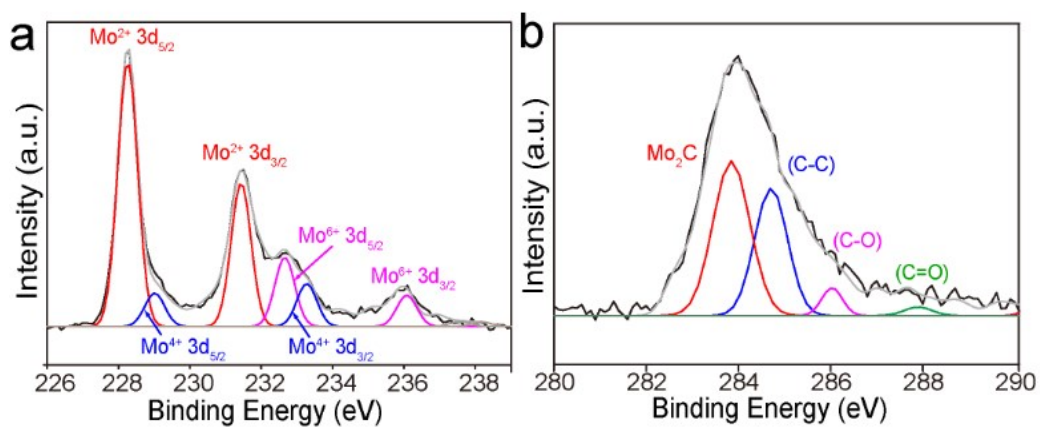

**Figure S22.** XPS spectra of (a) Mo 3d, (b) C 1s for 2D Mo<sub>2</sub>C nanosheet after stability test for HER.

**Table S1.** A comparison of the HER parameters of the 2D Mo<sub>2</sub>C in this work with various 2D samples and other state-of-the-art Mo<sub>2</sub>C-based catalysts.

| Materials                                            | Substrates           | Electrolytes                         | $\eta$ (mV)<br>( $j=10$ mA/cm <sup>2</sup> ) | Tafel Slope<br>(mV/dec) | Active Site                | Ref.      |
|------------------------------------------------------|----------------------|--------------------------------------|----------------------------------------------|-------------------------|----------------------------|-----------|
| Mo <sub>2</sub> C                                    | SiO <sub>2</sub> /Si | 0.5 M H <sub>2</sub> SO <sub>4</sub> | 281                                          | 54.4                    | Edge                       | This work |
|                                                      |                      | 1.0 M KOH                            | 168                                          | 35.2                    |                            |           |
| 1T-MoS <sub>2</sub>                                  | SiO <sub>2</sub> /Si | 0.5 M H <sub>2</sub> SO <sub>4</sub> | ~200                                         | ~40                     | Edge oxidation             | 1         |
| 1T-MoS <sub>2</sub>                                  | graphite             | 0.5 M H <sub>2</sub> SO <sub>4</sub> | 187                                          | 43                      | Edge                       | 2         |
| Monolayer 2H-MoS <sub>2</sub>                        | Au                   | 0.5 M H <sub>2</sub> SO <sub>4</sub> | 170                                          | 60                      | S-vacancy and strain       | 3         |
| 3Co <sub>Mo</sub> -V <sub>s</sub>                    | SiO <sub>2</sub> /Si | 0.5 M H <sub>2</sub> SO <sub>4</sub> | 75                                           | 57                      | in-plane domain            | 4         |
| MoS <sub>2</sub> /graphene                           | SiO <sub>2</sub> /Si | 0.5 M H <sub>2</sub> SO <sub>4</sub> | ~200                                         | 54                      | grain boundaries           | 5         |
| Mo SAs/ML-MoS <sub>2</sub>                           | SiO <sub>2</sub> /Si | 0.5 M H <sub>2</sub> SO <sub>4</sub> | ~107                                         | 36.4                    | unsaturate-d Mo SAs        | 6         |
|                                                      |                      | 1.0 M KOH                            | ~209                                         | 35.1                    |                            |           |
| Monolayer MoS <sub>2</sub>                           | Glass carbon (GC)    | 0.5 M H <sub>2</sub> SO <sub>4</sub> | —                                            | ~140                    | Edge                       | 7         |
| Monolayer MoS <sub>2</sub>                           | Au                   | 0.5 M H <sub>2</sub> SO <sub>4</sub> | ~200                                         | 61-74                   | Edge                       | 8         |
| 1T'-MoS <sub>2</sub>                                 | SiO <sub>2</sub> /Si | 0.5 M H <sub>2</sub> SO <sub>4</sub> | ~180                                         | 100                     | 1T' phase                  | 9         |
| 2H-MoS <sub>2</sub>                                  | SiO <sub>2</sub> /Si | 0.5 M H <sub>2</sub> SO <sub>4</sub> | ~230                                         | ~50                     | Sulfur vacancies           | 10        |
| Monolayer 2H-MoS <sub>2</sub>                        | SiO <sub>2</sub> /Si | 0.5 M H <sub>2</sub> SO <sub>4</sub> | ~430                                         | ~116                    | Edge                       | 11        |
| Monolayer 1T'-MoS <sub>2</sub>                       | SiO <sub>2</sub> /Si | 0.5 M H <sub>2</sub> SO <sub>4</sub> | ~355                                         | ~56                     | 1T' phase                  | 11        |
| Monolayer 2H-MoS <sub>2</sub>                        | Au                   | 0.5 M H <sub>2</sub> SO <sub>4</sub> | —                                            | 55                      | Edge                       | 12        |
| Monolayer MoS <sub>2-x</sub> O <sub>x</sub>          | Au                   | 0.5 M H <sub>2</sub> SO <sub>4</sub> | ~260                                         | 67                      | Oxidized basal plane       | 13        |
| Re <sub>0.55</sub> Mo <sub>0.45</sub> S <sub>2</sub> | GC                   | 0.5 M H <sub>2</sub> SO <sub>4</sub> | ~170                                         | 56                      | Re-doped                   | 14        |
| V <sub>Re</sub> -ReS <sub>2</sub>                    | SiO <sub>2</sub> /Si | 0.5 M H <sub>2</sub> SO <sub>4</sub> | 147                                          | 69                      | Re vacancy                 | 15        |
| 1T-SnS <sub>2</sub>                                  | SiO <sub>2</sub> /Si | 0.5 M H <sub>2</sub> SO <sub>4</sub> | ~450                                         | 96                      | dendritic SnS <sub>2</sub> | 16        |
| 1T-TaS <sub>2</sub>                                  | Au                   | 0.5 M H <sub>2</sub> SO <sub>4</sub> | ~205                                         | 72                      | 1T phase                   | 17        |
| 2H-TaS <sub>2</sub>                                  | Au                   | 0.5 M H <sub>2</sub> SO <sub>4</sub> | 65–150                                       | 33                      | 2H phase                   | 18        |
| TaS <sub>2</sub> -N <sub>2</sub> H <sub>4</sub>      | SiO <sub>2</sub> /Si | 0.5 M H <sub>2</sub> SO <sub>4</sub> | ~400                                         | 76                      | Intercalate-d flake        | 19        |
| 3DHP-Mo <sub>2</sub> C                               | GC                   | 0.5 M H <sub>2</sub> SO <sub>4</sub> | 97                                           | 60                      | Porous framework           | 20        |
| Mo <sub>2</sub> C NP                                 | GC                   | 0.5 M H <sub>2</sub> SO <sub>4</sub> | 144                                          | 55                      | Nanoparticle               | 21        |
|                                                      |                      | 1.0 M KOH                            | 100                                          | 65                      |                            |           |
| Mo <sub>2</sub> C@NC                                 | GC                   | 0.5 M H <sub>2</sub> SO <sub>4</sub> | 121                                          | 67                      | Nanodots                   | 22        |
| Mo <sub>2</sub> C NT                                 | GC                   | 0.5 M H <sub>2</sub> SO <sub>4</sub> | 172                                          | 62                      | Nanoparticle               | 23        |
|                                                      |                      | 1.0 M KOH                            | 112                                          | 55                      |                            |           |

## References

1. D. Voiry, M. Salehi, R. Silva, T. Fujita, M. Chen, T. Asefa, V. B. Shenoy, G. Eda and M. Chhowalla, *Nano Lett*, 2013, **13**, 6222-6227.
2. M. A. Lukowski, A. S. Daniel, F. Meng, A. Forticaux, L. Li and S. Jin, *Journal of the American Chemical Society*, 2013, **135**, 10274-10277.
3. H. Li, C. Tsai, A. L. Koh, L. Cai, A. W. Contryman, A. H. Fragapane, J. Zhao, H. S. Han, H. C. Manoharan, F. Abild-Pedersen, J. K. Nørskov and X. Zheng, *Nat Mater*, 2016, **15**, 364.
4. Y. Zhou, J. Zhang, E. Song, J. Lin, J. Zhou, K. Suenaga, W. Zhou, Z. Liu, J. Liu, J. Lou and H. J. Fan, *Nat Commun*, 2020, **11**, 2253.
5. Y. He, P. Tang, Z. Hu, Q. He, C. Zhu, L. Wang, Q. Zeng, P. Golani, G. Gao, W. Fu, Z. Huang, C. Gao, J. Xia, X. Wang, X. Wang, C. Zhu, Q. M. Ramasse, A. Zhang, B. An, Y. Zhang, S. Marti-Sanchez, J. R. Morante, L. Wang, B. K. Tay, B. I. Yakobson, A. Trampert, H. Zhang, M. Wu, Q. J. Wang, J. Arbiol and Z. Liu, *Nat Commun*, 2020, **11**, 57.
6. Y. Luo, S. Zhang, H. Pan, S. Xiao, Z. Guo, L. Tang, U. Khan, B. F. Ding, M. Li, Z. Cai, Y. Zhao, W. Lv, Q. Feng, X. Zou, J. Lin, H. M. Cheng and B. Liu, *ACS Nano*, 2020, **14**, 767-776.
7. Y. Yu, S.-Y. Huang, Y. Li, S. N. Steinmann, W. Yang and L. Cao, *Nano Letters*, 2014, **14**, 553-558.
8. J. Shi, D. Ma, G.-F. Han, Y. Zhang, Q. Ji, T. Gao, J. Sun, X. Song, C. Li, Y. Zhang, X.-Y. Lang, Y. Zhang and Z. Liu, *Acs Nano*, 2014, **8**, 10196-10204.
9. Y. Yu, G. H. Nam, Q. He, X. J. Wu, K. Zhang, Z. Yang, J. Chen, Q. Ma, M. Zhao, Z. Liu, F. R. Ran, X. Wang, H. Li, X. Huang, B. Li, Q. Xiong, Q. Zhang, Z. Liu, L. Gu, Y. Du, W. Huang and H. Zhang, *Nat Chem*, 2018, **10**, 638-643.
10. D. Voiry, R. Fullon, J. Yang, E. S. C. de Carvalho Castro, R. Kappera, I. Bozkurt, D. Kaplan, M. J. Lagos, P. E. Batson, G. Gupta, A. D. Mohite, L. Dong, D. Er, V. B. Shenoy, T. Asefa and M. Chhowalla, *Nat Mater*, 2016, **15**, 1003-1009.
11. J. Zhang, J. Wu, H. Guo, W. Chen, J. Yuan, U. Martinez, G. Gupta, A. Mohite, P. M. Ajayan and J. Lou, *Adv Mater*, 2017, **29**.
12. T. F. Jaramillo, K. P. Jørgensen, J. Bonde, J. H. Nielsen, S. Horch and I. Chorkendorff, *Science*, 2007, **317**, 100-102.
13. J. Peto, T. Ollar, P. Vancso, Z. I. Popov, G. Z. Magda, G. Dobrik, C. Hwang, P. B. Sorokin and L. Tapasztó, *Nat Chem*, 2018, **10**, 1246-1251.
14. S. Z. Yang, Y. Gong, P. Manchanda, Y. Y. Zhang, G. Ye, S. Chen, L. Song, S. T. Pantelides, P. M. Ajayan, M. F. Chisholm and W. Zhou, *Adv Mater*, 2018, **30**, 1803477.
15. Y. Zhou, E. Song, J. Zhou, J. Lin, R. Ma, Y. Wang, W. Qiu, R. Shen, K. Suenaga, Q. Liu, J. Wang, Z. Liu and J. Liu, *ACS Nano*, 2018, **12**, 4486-4493.
16. G. Shao, X. X. Xue, X. Zhou, J. Xu, Y. Jin, S. Qi, N. Liu, H. Duan, S. Wang, S. Li, M. Ouzounian, T. S. Hu, J. Luo, S. Liu and Y. Feng, *ACS Nano*, 2019, **13**, 8265-8274.

17. Y. Huan, J. Shi, X. Zou, Y. Gong, Z. Zhang, M. Li, L. Zhao, R. Xu, S. Jiang, X. Zhou, M. Hong, C. Xie, H. Li, X. Lang, Q. Zhang, L. Gu, X. Yan and Y. Zhang, *Adv Mater*, 2018, **30**, 1705916.
18. J. Shi, X. Wang, S. Zhang, L. Xiao, Y. Huan, Y. Gong, Z. Zhang, Y. Li, X. Zhou, M. Hong, Q. Fang, Q. Zhang, X. Liu, L. Gu, Z. Liu and Y. Zhang, *Nat Commun*, 2017, **8**, 958.
19. Y. Guo, Q. Chen, A. Nie, H. Yang, W. Wang, J. Su, S. Wang, Y. Liu, S. Wang, H. Li, Z. Liu and T. Zhai, *ACS Nano*, 2020, **14**, 1635-1644.
20. H. Ang, H. Wang, B. Li, Y. Zong, X. Wang and Q. Yan, *Small*, 2016, **12**, 2859-2865.
21. Y. Huang, Q. Gong, X. Song, K. Feng, K. Nie, F. Zhao, Y. Wang, M. Zeng, J. Zhong and Y. Li, *ACS Nano*, 2016, **10**, 11337-11343.
22. H. Wang, Y. Lin, S. Liu, J. Li, L. Bu, J. Chen, X. Xiao, J.-H. Choi, L. Gao and J.-M. Lee, *Journal of Materials Chemistry A*, 2020, **8**, 7109-7116.
23. F. X. Ma, H. B. Wu, B. Y. Xia, C. Y. Xu and X. W. Lou, *Angew Chem Int Ed Engl*, 2015, **54**, 15395-15399.
